# Supplementary material
Source: publisher figshare collection journal article supplement (https://acs.figshare.com/ndownloader/files/4118503)
Supplement: Supplementary file 1 [file 4118503]

## Supporting Information

# Low-Temperature Aluminum Reduction of Graphene Oxide, Electrical Properties, Surface Wettability, and Energy Storage Applications

*Dongyun Wan,<sup>1,†</sup> Chongyin Yang,<sup>1,†</sup> Tianquan Lin,<sup>1</sup> Yufeng Tang,<sup>1</sup> Mi Zhou,<sup>1</sup> Yajuan Zhong,<sup>1</sup>  
Fuqiang Huang,<sup>1,2\*</sup> Jianhua Lin<sup>2\*</sup>*

<sup>1</sup> CAS Key Laboratory of Materials for Energy Conversion, Shanghai Institute of Ceramics, Chinese Academy of Sciences, Shanghai 200050, P.R. China; <sup>2</sup> State Key Laboratory of Rare Earth Materials Chemistry and Applications, College of Chemistry and Molecular Engineering, Peking University, Beijing 100871, P. R. China

*\*Correspondence should be addressed to [huangfq@mail.sic.ac.cn](mailto:huangfq@mail.sic.ac.cn) (F. Huang), [jhlin@pku.edu.cn](mailto:jhlin@pku.edu.cn) (J. Lin).*

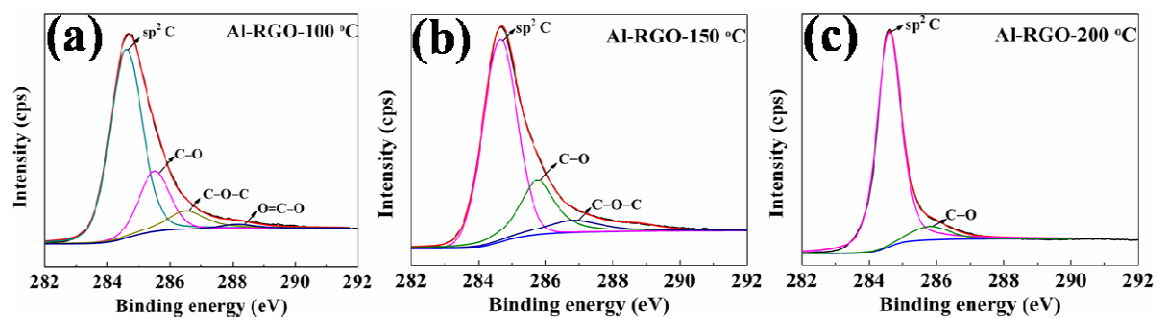

**Figure S1.** C1s XPS spectra of GO papers reduced *via* Al powder under different temperature of (a) 100 °C, (b) 150 °C, and (c) 200 °C.

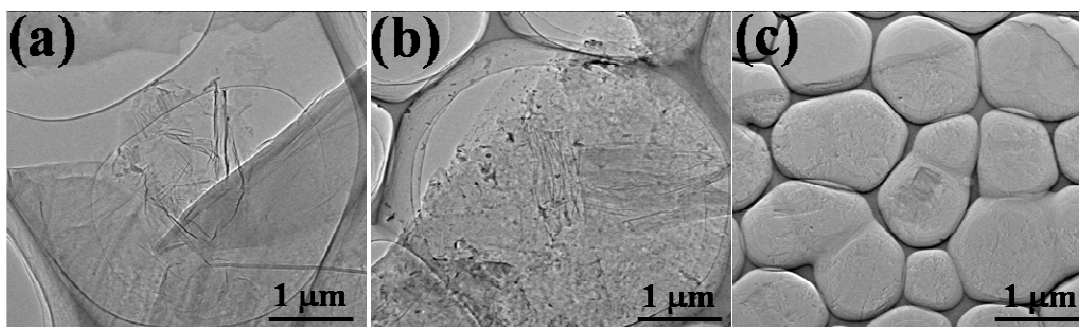

**Figure S2.** TEM images of (a) GO, (b) 500 °C T-RGO, and (c) 200 °C Al-RGO.

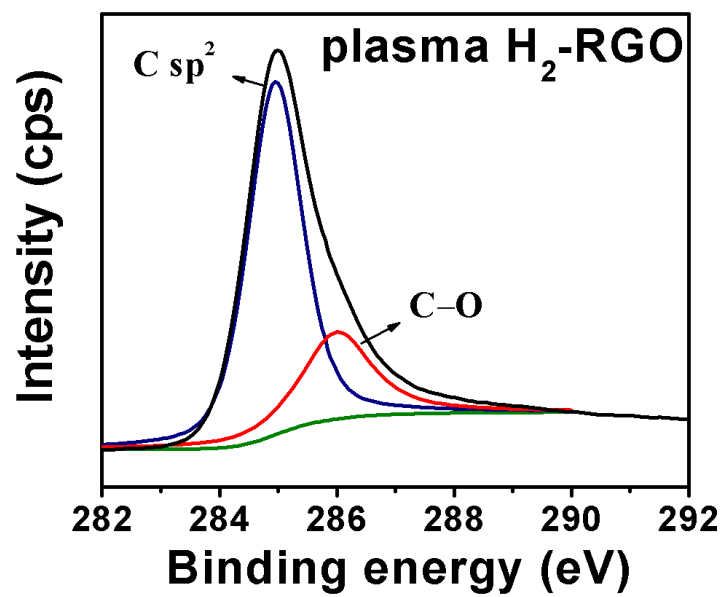

**Figure S3.** C1s XPS spectra of GO papers reduced *via* the plasma hydrogen.
